# Supplementary material for: Photothermal theranostics with glutathione depletion and enhanced reactive oxygen species generation for efficient antibacterial treatment
Source: Royal Society of Chemistry journal article supplement (doi:10.1039/d3ra03246a), 2023-01-01
Supplement: d3ra03246a1.pdf [file d3ra03246a1.pdf]

## Supporting information

### Photothermal theranostics with glutathione depletion and enhanced reactive oxygen species generation for efficient antibacterial treatment

Yuelan Wu<sup>a,b</sup>, Xiaoxue Liu<sup>b,c</sup>, Xiaoyu Zhang<sup>b,c</sup>, Shuping Zhang<sup>c,d</sup>, Panhong Niu<sup>d\*</sup>,

Hua Gao<sup>a,b,c\*</sup>

*a. Qingdao University, Qingdao, Shandong 266071, P. R. China*

*b. Eye Institute of Shandong First Medical University, State Key Laboratory Cultivation Base, Shandong Provincial Key Laboratory of Ophthalmology, Qingdao, Shandong 250071, P. R. China.*

*c. Medical Science and Technology Innovation Center, Shandong First Medical University & Shandong Academy of Medical Sciences, Jinan, Shandong 250117, P. R. China.*

*d. Biomedical Sciences College & Shandong Medicinal Biotechnology Centre, Shandong First Medical University & Shandong Academy of Medical Sciences, Jinan, 250117, P. R. China.*

\* Correspondence:

[hgao@sdfmu.edu.cn](mailto:hgao@sdfmu.edu.cn) (Hua Gao) and [niupanhong@sdfmu.edu.cn](mailto:niupanhong@sdfmu.edu.cn) (Panhong Niu)

**Table S1.** The correlation parameters of photothermal conversion ability of PDA-FDM-23.

| Parameter | $T_{\max}$ | $T_{\text{suur}}$ | $A_{808}$ | $m$  | $c$     | $\tau_s$ | $\eta$ |
|-----------|------------|-------------------|-----------|------|---------|----------|--------|
| Value     | 55.8       | 23.3              | 1.982     | 0.5g | 4.2 J/g | 266.364  | 17.26% |

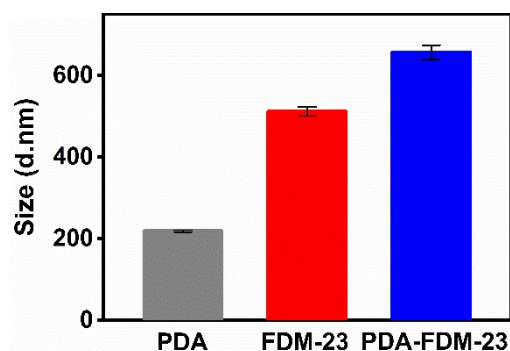

**Fig. S1** DLS analysis of PDA, FDM-23, and PDA-FDM-23.

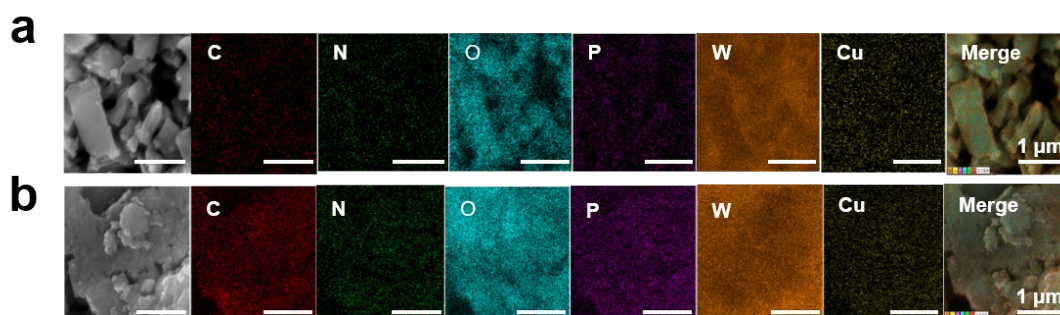

**Fig. S2** EDS mapping images of FDM-23 (a) and PDA-FDM-23 (b).

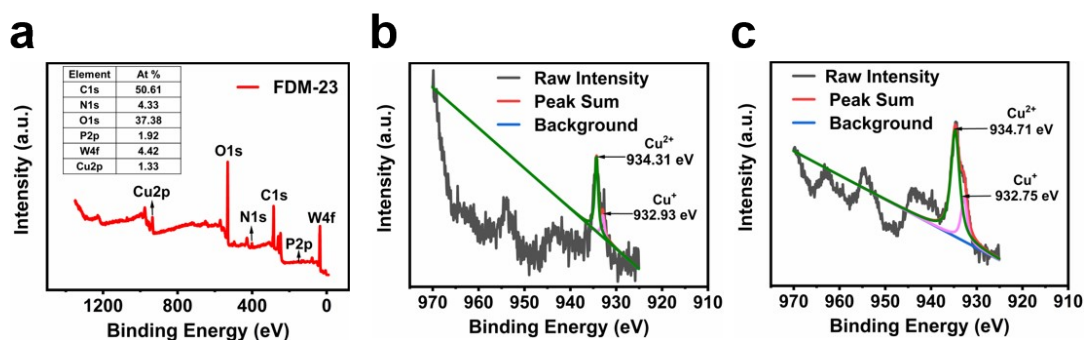

**Fig. S3 (a)** XPS survey spectra analysis of FDM-23. **(b)** Cu2p core of PDA-FDM-23 level spectra. **(c)** Cu2p core of FDM-23 level spectra.

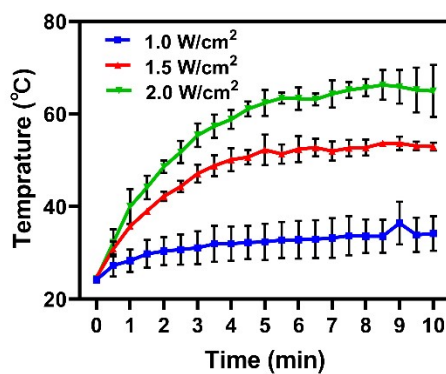

**Fig. S4** Heating curves of 100 µg/mL PDA-FDM-23 under laser irradiation with different powers (1.0 W/cm², 1.5 W/cm² and 2.0 W/cm²).

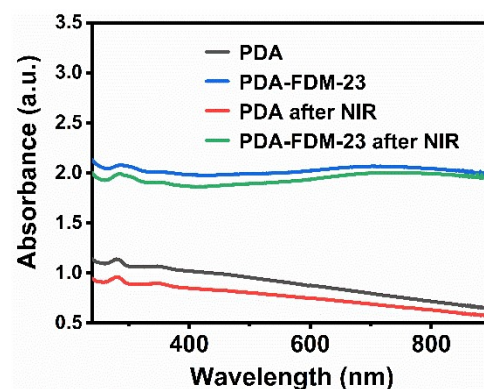

**Fig. S5** The UV-vis absorption spectra of PDA-FDM-23 composites before and after laser irradiation (1.5 W/cm², 10 min).

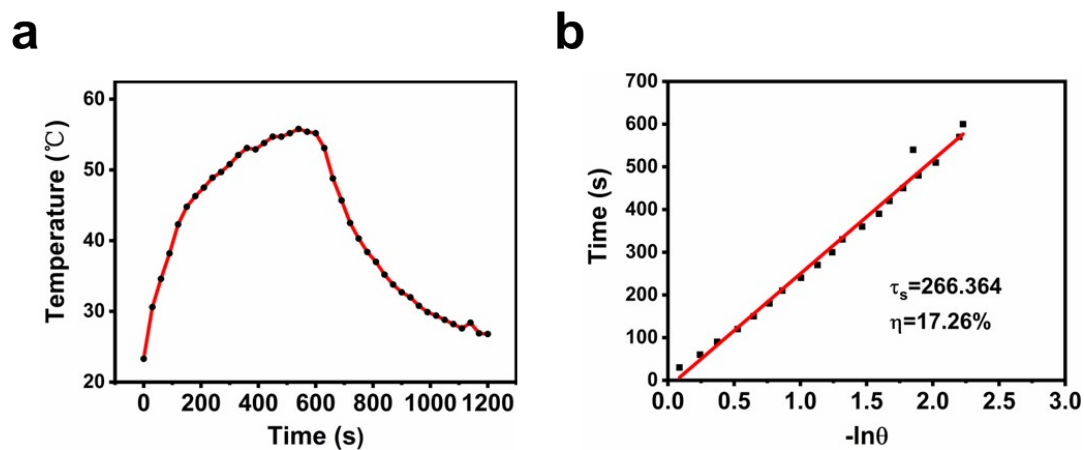

**Fig. S6** (a) Heating and cooling curves of PDA-FDM-23 under laser irradiation (808 nm, 1.5 W/cm<sup>2</sup>). (b) Linear time data versus  $-\ln\theta$  obtained from the cooling time.

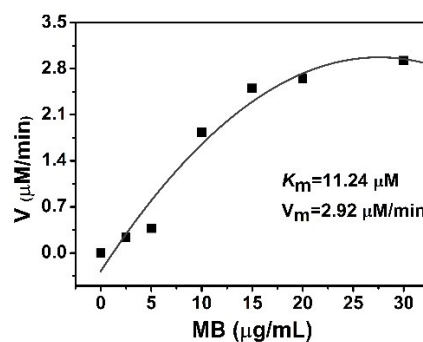

**Fig. S7** The Michaelis–Menten curve for PDA-FDM-23.

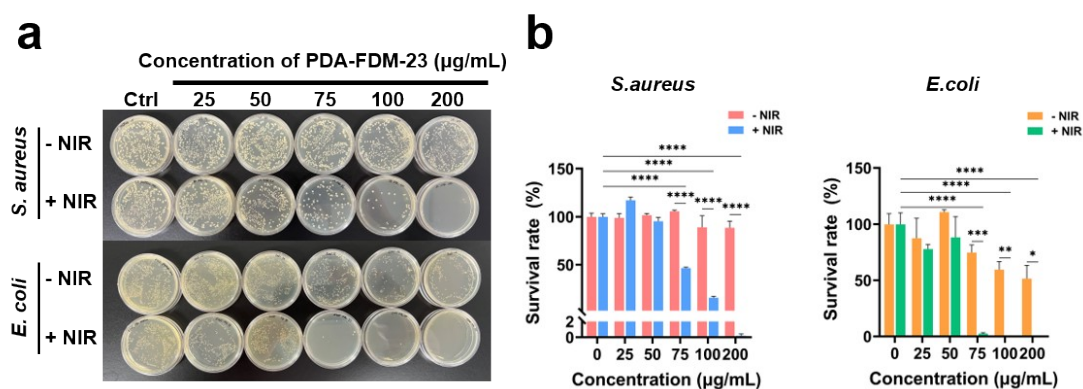

**Fig. S8** (a) Plate photographs of *S. aureus* and *E. coli* treated with different concentrations of PDA-FDM-23 in the presence and absence of light (1.5 W/cm<sup>2</sup>, 20 minutes). (b) Relative bacterial survival rates of *S. aureus* and *E. coli* based on (a). Data

were represented as means  $\pm$  SEM (n = 3). ns: no significant difference, \*\*\*\* $P$  < 0.0001, \*\*\* $P$  < 0.001, \*\* $P$  < 0.01.

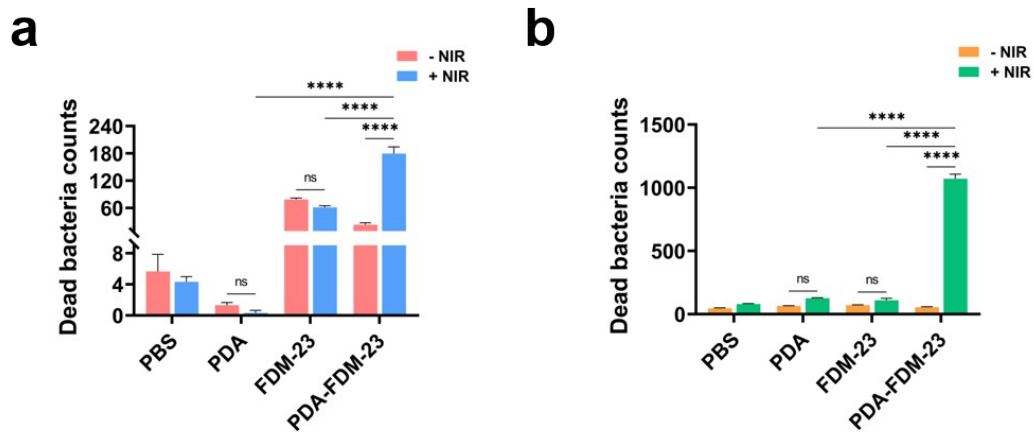

**Fig. S9** The dead bacteria count of PI-labeled *S. aureus* (a) and *E. coli* (b). Data were represented as means  $\pm$  SEM (n = 3). ns: no significant difference. \*\*\*\* $P$  < 0.0001.

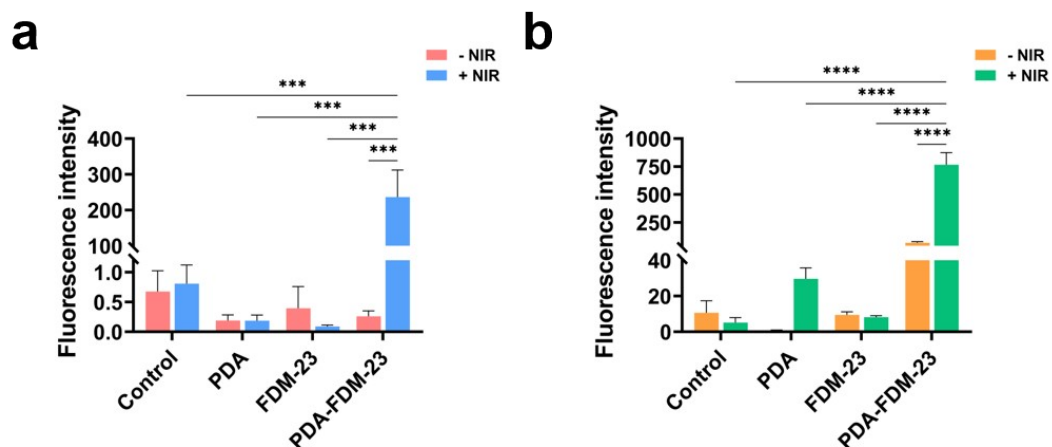

**Fig. S10** Relative quantification of ROS fluorescence intensity after incubation with *S. aureus* (a) and *E. coli* (b) in each group. Data were represented as means  $\pm$  SEM (n = 3). \*\*\* $P$  < 0.001, \*\*\*\* $P$  < 0.0001.
